# Supplementary material
Source: publisher site journal article supplement (https://www.spandidos-publications.com/4956/downloadSupplementary)

Figure S1. Invasion ability of seven human lung cancer cell lines assessed using a Transwell assay. Magnification, x200.

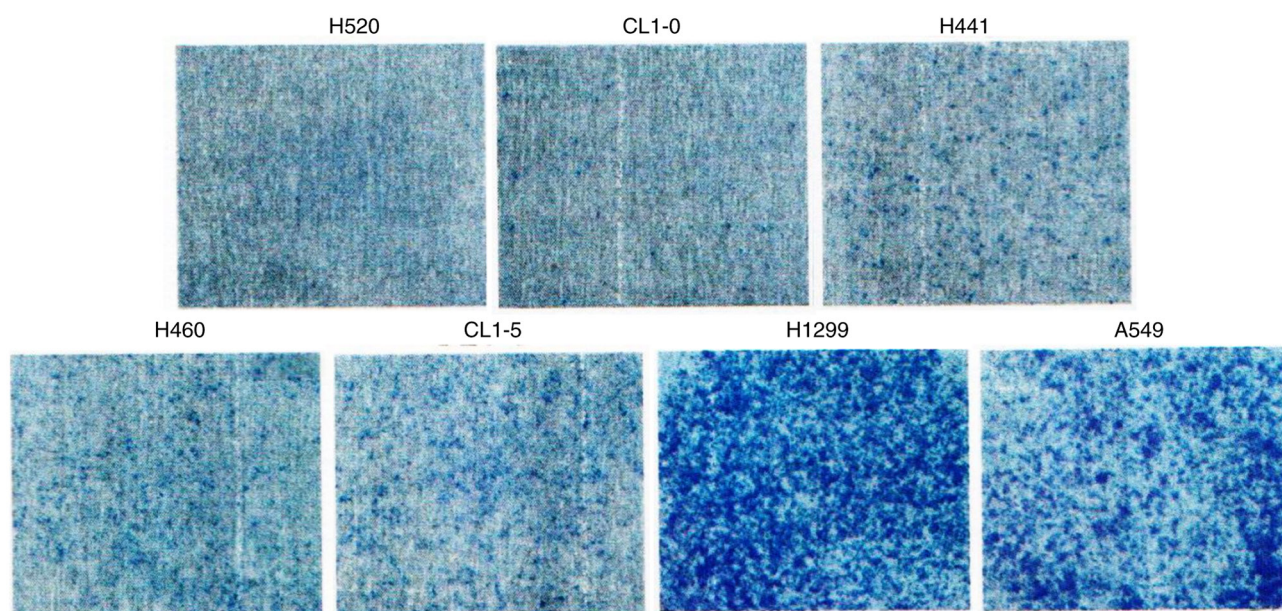

Figure S2. Fumarate and malate levels in FH knockdown CL1-0 cells as assessed by mass spectrometry. Four repeats were used for each group. Data are presented as the mean  $\pm$  SD and were analyzed using an unpaired Student's t-test. \*\* $P < 0.001$  and \*\*\* $P < 0.0001$ . FH, fumarate hydratase; shFH, short hairpin RNA targeting FH; shluc, shRNA targeting firefly luciferase.

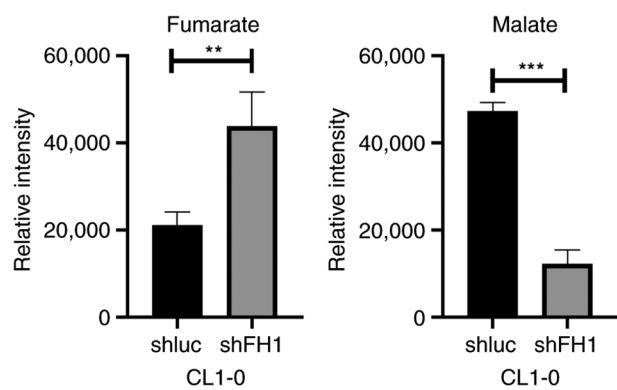

Figure S3. Expression of JAG1 and IFRD1 proteins in FH knockdown and overexpressing lung cancer cells. Western blots showing JAG1 and IFRD1 protein expression in (A) FH knockdown CL1-0 and H441 cells and (B) FH overexpressing H1299 cells. All western blots were performed twice independently. FH, fumarate hydratase; shFH, short hairpin RNA targeting FH; shluc, shRNA targeting firefly luciferase.

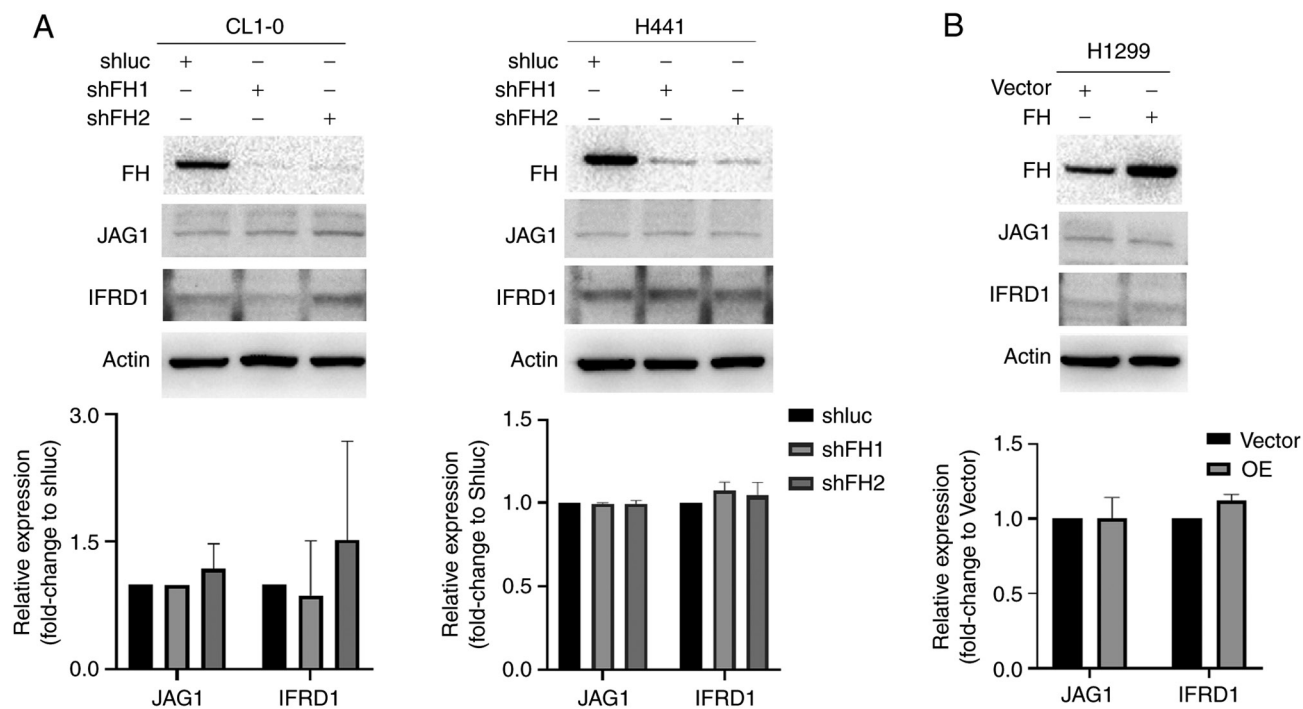

Supplement: Supplementary file 1 [file downloadSupplementary]
